# Supplementary material for: Degradome sequencing-based identification of phasiRNAs biogenesis pathways in Oryza sativa
Source: Research Square preprint supplement (doi:10.21203/rs.3.rs-52306/v2), 2020-11-11
Supplement: Supplementary file 1 [file 0c08ab217d60a5433ca7d69c.xlsx]

## Sheet: Table S3
Table S3 The data sets utilized for identification of PHAS loci in Oryza sativa
Data sets	Samples	GEO_number
Small RNA high-throughput sequencing data sets	seedling_control	GSM455965, GSM816687,GSM816688 and GSM816689
	seedling_drought	GSM816690 and GSM816691
	seedling_salt	GSM816692 and GSM 816693
	seedling_cold	GSM816694 and GSM816695
	root_control	GSM816704 and GSM816705
	root_drought	GSM816716 and GSM816717
	root_salt and lack of potassium	GSM816714 and GSM816715
	shoot_control	GSM816718 and GSM816719
	shoot_salt and lack of potassium	GSM816728 and GSM816729
	panicle_control	GSM816730, GSM816731 and GSM816732
	panicle_drought	GSM816733,GSM816734 and GSM816735
	panicle_salt	GSM816736, GSM816737 and GSM816738
	panicle_cold	GSM816739 and GSM816740
	seedling (wt)	GSM562942
	panicle (wt)	GSM562943
	seedling (osdcl4-1)	GSM562944
	panicle (osdcl4-1)	GSM562945
	Seedling (wt)	GSM520638
	Seedling (osdcl3-1)	GSM520640
Degradome sequencing data sets	Seedling	GSM434596
	Seedling	GSM455938
	inflorescenceyoung inflorescences	GSM455939
		GSM476257
